# Supplementary material for: Plastid Transformation of Micro-Tom Tomato with a Hemipteran Double-Stranded RNA Results in RNA Interference in Multiple Insect Species
Source: MDPI journal article supplement (doi:10.3390/ijms23073918), 2022-04-01
Supplement: s1 [file s1]

## Supplementary material

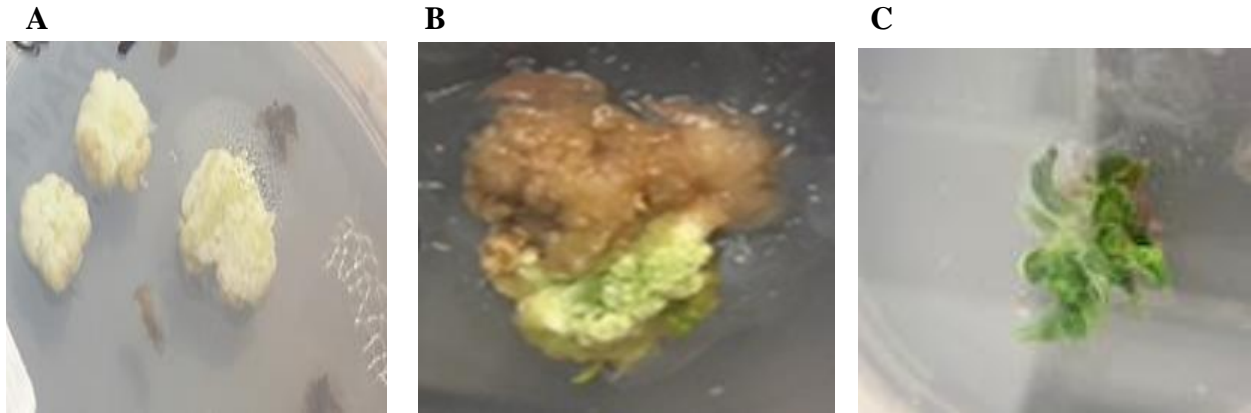

**Supplementary Figure S1. Development of transplastomic Micro-tom plants to produce dsRNA for cotton mealybug *v-ATPaseA* gene.** (A) Transformed Micro-tom leaf explants form pale yellow calli. (B) Micro-tom callus after repeated passage on regeneration media. (C) Micro-tom callus with shoots after being placed on shoot-inducing medium.

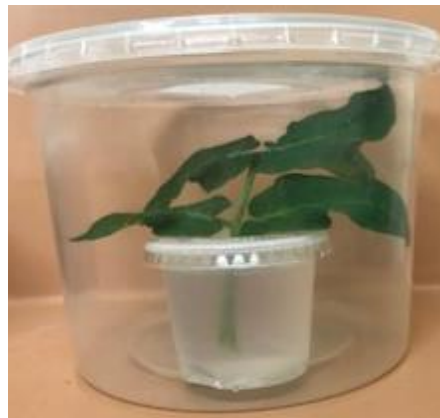

**Supplementary Figure S2. An example of leaf petiole preparation for feeding Micro-tom to Madeira mealybugs and BMSB.** The leaf petiole was immersed in water (in 29 mL plastic solo cup) and then placed in larger containers for insect feeding.

| Domain: Data                            | Coding | Codon Start: 1 |   |   |   |   |   |   |   |   |   |   |   |   |   |   |   |   |   |   |   |   |   |   |   |   |   |   |   |   |   |   |   |   |   |   |   |   |   |   |
|-----------------------------------------|--------|----------------|---|---|---|---|---|---|---|---|---|---|---|---|---|---|---|---|---|---|---|---|---|---|---|---|---|---|---|---|---|---|---|---|---|---|---|---|---|---|
| <i>Halymorpha halys</i> v-ATPaseA       | A      | T              | C | T | G | A | G | A | A | G | T | C | A | C | C | A | C | A | G | G | A | G | G | T | G | A | C | A | C | A | G | C | C | G | A | C |   |   |   |   |
| <i>Phenacoccus solenopsis</i> v-ATPaseA | -      | -              | - | - | G | A | G | A | A | G | T | C | A | C | C | A | C | A | G | G | A | G | G | C | G | A | T | A | C | C | G | G | C | C | A | A | C |   |   |   |
| <i>Halymorpha halys</i> v-ATPaseA       | G      | A              | T | G | G | A | C | A | C | G | G | A | T | C | C | T | T | C | T | C | T | C | T | C | T | G | G | A | T | T | A | C | C | A | A | G | G | C | A |   |
| <i>Phenacoccus solenopsis</i> v-ATPaseA | A      | A              | T | A | C | T | C | A | C | A | G | A | A | C | C | T | T | C | T | C | T | G | T | C | G | G | G | A | T | T | T | C | C | G | A | G | A | C | A |   |
| <i>Halymorpha halys</i> v-ATPaseA       | C      | T              | T | G | A | C | T | C | T | G | C | C | A | G | C | A | C | G | T | T | C | G | T | A | G | A | A | T | G | A | A | G | C | C | A | A | T | C | G |   |
| <i>Phenacoccus solenopsis</i> v-ATPaseA | C      | T              | T | A | A | T | T | C | G | A | C | C | G | G | C | T | C | T | T | T | C | G | T | A | G | A | A | G | G | A | A | G | C | T | A | A | T | C | T |   |
| <i>Halymorpha halys</i> v-ATPaseA       | A      | G              | C | T | C | C | C | A | A | G | T | A | A | G | C | A | G | G | G | T | A | A | C | C | A | C | T | G | T | C | G | G | C | A | G | G | C | A | T |   |
| <i>Phenacoccus solenopsis</i> v-ATPaseA | A      | G              | C | T | C | C | T | A | A | A | T | A | T | G | C | A | G | G | G | T | A | A | C | C | A | G | C | T | G | T | C | C | G | C | A | G | G | C | A | T |
| <i>Halymorpha halys</i> v-ATPaseA       | T      | T              | C | A | G | C | C | A | A | A | C | G | A | C | C | G | G | A | A | A | T | T | T | C | T | C | T | C | A | A | A | G | C | C | T | C | A | G | C |   |
| <i>Phenacoccus solenopsis</i> v-ATPaseA | C      | T              | C | T | G | C | C | A | A | A | C | G | T | C | C | G | G | A | A | A | T | T | T | C | T | C | T | C | A | G | - | G | C | T | T | C | A | G |   |   |

|                                            |                                                                                   |
|--------------------------------------------|-----------------------------------------------------------------------------------|
| Domain: Data Coding Codon Start: 1         |                                                                                   |
| <i>Leptinotarsa decemlineata</i> v-ATPaseA | C T A A A G T T G C T G A A G T A A C G G G A T C T - G A G A A A G T C A C C A C |
| <i>Phenacoccus solenopsis</i> v-ATPaseA    | - - - - - - - - - - - - - - - - - - - - - - G A G A A A G T C A C C A C           |
| <hr/>                                      |                                                                                   |
| <i>Leptinotarsa decemlineata</i> v-ATPaseA | C G G G T T G G A G A T A C T G C T C C T A C A G A T A G A A A C C G A T C C T T |
| <i>Phenacoccus solenopsis</i> v-ATPaseA    | C A G G A G G C G A T A C C G C G C C A A C A A T A C T C A C A G A A C C T T     |
| <hr/>                                      |                                                                                   |
| <i>Leptinotarsa decemlineata</i> v-ATPaseA | C T C T G T C A G G G T T A C C C A A A C A T T T G A C G C G A C C A G C A C     |
| <i>Phenacoccus solenopsis</i> v-ATPaseA    | C T C T G T C G G G A T T T C C G A G A C A C T T A A T T C G A C C G G C T C     |
| <hr/>                                      |                                                                                   |
| <i>Leptinotarsa decemlineata</i> v-ATPaseA | G T T C A T A G A A A G A G G C A A A G A C G A G C A C C C A A A G T A G G C T G |
| <i>Phenacoccus solenopsis</i> v-ATPaseA    | T T T C G T A G A A A G A A G C T A A T C T A G C T C C T A A A T A T G C A G     |
| <hr/>                                      |                                                                                   |
| <i>Leptinotarsa decemlineata</i> v-ATPaseA | G G T A A C C A G A A T C A G C A G G C A T T T C A G C C A A A C G T C C T G     |
| <i>Phenacoccus solenopsis</i> v-ATPaseA    | G G T A A C C G C T G T C C G C A G G C A T C T C T G C C A A A C G T C C G       |
| <hr/>                                      |                                                                                   |
| <i>Leptinotarsa decemlineata</i> v-ATPaseA | A A A T T T C T C T C A A A G C T T C A G C C C A A C G T G A T G T A G A G T     |
| <i>Phenacoccus solenopsis</i> v-ATPaseA    | A A A T T T C T C T C - A G G C T T C A G - - - - - - - - - - - - - - -           |

[illegible]

|                                         |                                                                               |
|-----------------------------------------|-------------------------------------------------------------------------------|
| <i>Phenacoccus solenopsis</i> v-ATPaseA | G A G A A G T C A C C A C C A G G A G G C G A T A C C G C G C C A A C A A T A |
|                                         | C T C A C A G A A C C T T C T C T G T C G G G A T T T C C G A G A C A C T T A |
|                                         | A T T C G A C C G G C T C T T T C G T A G A A G G A A G C T A A T C T A G C T |
|                                         | C C T A A A T A T G C A G G G T A A C C G C T G T C C G C A G G C A T C T C T |
|                                         | G C C A A A C G T C C G G A A A T T T C T C T C A G G C T T C A G             |

**E**

|                    |                                                                               |
|--------------------|-------------------------------------------------------------------------------|
| GFP dsRNA fragment | A C T T T T C A C T G G A G T T G T C C C A A T T C T T G T T G A A T T A G A |
|                    | T G G T G A T G T T A A T G G G C A C A A A T T T T C T G T C A G T G G A G A |
|                    | G G G T G A A G G T G A T G C A A C A T A C G G A A A A C T T A C C C T T A A |
|                    | A T T T A T T T G C A C T A C T G G A A A A C T A C C T G T T C C A T G G G T |
|                    | A A G T T T A A A C A T A T A T A T A C T A A C T A A C C C T G A T T A T T T |
|                    | A A A T T T T C A G C C A A C A C T T G T C A C T A C T                       |

**Supplementary Figure S3. Alignment of 189 bp *Phenacoccus solenopsis* *v-ATPaseA* gene fragment used in plant transformation with the *v-ATPaseA* genes of insects used in this study.** (A) Alignment of dsRNA sequence with BMSB *v-ATPaseA* gene; (B) Alignment of dsRNA sequence with CPB *v-ATPaseA* gene; (C) Alignment of dsRNA sequence with Madeira mealybug *v-ATPaseA* gene; (D) 189 bp *Phenacoccus solenopsis* *v-ATPaseA* gene fragment used in this study; (E) 223 bp GFP gene fragment used in *in vitro* bioassays.

**Supplementary Table S1. Primers and probes used in this study.**

| <b>Primer name</b>                                                                                        | <b>5' to 3' sequence</b>                        |
|-----------------------------------------------------------------------------------------------------------|-------------------------------------------------|
| <b>Primers used for cloning of dsRNA sequence into pTomCT vector</b>                                      |                                                 |
| <i>NotI-v-ATPaseA F</i>                                                                                   | GCGGCCGCCTGAAGCCTGAGAGAAAT                      |
| <i>SalI-v-ATPaseA R</i>                                                                                   | GTCGACGAGAAGTCACCACCAGG                         |
| <b>Primers used for preparing Dig-labelled probe for Southern blotting</b>                                |                                                 |
| <b>DPSI F</b>                                                                                             | TCAATCCCTTTGCCCCCTCAT                           |
| <b>DLSI R</b>                                                                                             | TCAACTGCCCTATCGGAA                              |
| <b>Primers and probes used for confirming dsRNA production and quantification of dsRNA in tpMicro-tom</b> |                                                 |
| <b>dsRNA<sub>v-ATPaseA</sub> F</b>                                                                        | CGGTTACCCTGCATATTTAG                            |
| <b>dsRNA<sub>v-ATPaseA</sub> R</b>                                                                        | CAACAATACTCACAGAACCTTCT                         |
| <b>dsRNA<sub>v-ATPaseA</sub> probe</b>                                                                    | [6~FAM]CTTCCTTCTACGAAAGAGCCGGTCTGAATT[BHQ 1a~Q] |
| <b>TIP41 F</b>                                                                                            | AGACGCCAATGCAACCAAA                             |
| <b>TIP41 R</b>                                                                                            | AGTGTGGAAGTGCAATACCT                            |
| <b>TIP41 probe</b>                                                                                        | [6~FAM]TCCTTACAATCCTCCCACTGAATGCAGC[BHQ1a~Q]    |
| <b>Colorado potato beetle primers used for qPCR</b>                                                       |                                                 |
| <i>v-ATPaseA F</i>                                                                                        | CCAGCTAATCACCCGCTTCT                            |
| <i>v-ATPaseA R</i>                                                                                        | CAACCGAAAGCACCGGGAAT                            |
| <b>L8E F</b>                                                                                              | GGTAACCATCAACACATTGG                            |
| <b>L8E R</b>                                                                                              | TCTTGGCATCCACTTTACC                             |
| <b>Brown marmorated stink bug primers used for qPCR</b>                                                   |                                                 |
| <i>v-ATPaseA F</i>                                                                                        | AACTTCCCCGAGTTTGTTC                             |
| <i>v-ATPaseA R</i>                                                                                        | TTCAGCGAGGGAGGCTTTA                             |
| <b>60S RP F</b>                                                                                           | CCATCAGCAGCTTCTCTTATCA                          |
| <b>60S RP R</b>                                                                                           | CTGGCGATGGTGAGGATTT                             |
| <b>Madeira mealybug primers used for qPCR</b>                                                             |                                                 |
| <i>v-ATPaseA F</i>                                                                                        | GCTGAGGTATTACGAGATTTCC                          |
| <i>v-ATPaseA R</i>                                                                                        | TTGGCGACGAGAGCTGTTC                             |
| <i>betaTub F</i>                                                                                          | CCGACGAACATGGCATTGAC                            |
| <i>betaTub R</i>                                                                                          | TGGTTCCGGGTTCAAGATCG                            |
| <b>Primers used for sequencing of Madeira mealybug <i>v-ATPaseA</i> gene</b>                              |                                                 |
| <i>v-ATPaseA F</i>                                                                                        | CACTATGCTTCAAGTATGGCC                           |
| <i>v-ATPaseA R</i>                                                                                        | GACCCCGAACAACCTTGCAC                            |

**Supplementary Table S2. Data values for Figure 1.**

| Figure 1: data for CPB fed with in vitro synthesized v-ATPaseA dsRNA from cotton mealybug              |                 |       |       |                |       |       |             |       |      |                     |                   |                                |
|--------------------------------------------------------------------------------------------------------|-----------------|-------|-------|----------------|-------|-------|-------------|-------|------|---------------------|-------------------|--------------------------------|
|                                                                                                        | v-ATPase raw Ct |       |       | L8e raw Ct     |       |       | $\Delta$ Ct |       |      | $\Delta$ Ct average | $\Delta\Delta$ Ct | $2^{-(\Delta\Delta\text{Ct})}$ |
| treatment                                                                                              | bio1            | bio2  | bio3  | bio1           | bio2  | bio3  | bio1        | bio2  | bio3 |                     |                   |                                |
| H2O                                                                                                    | 18.59           | 19.15 | 19.17 | 13.93          | 14.62 | 14.32 | 4.66        | 4.53  | 4.85 | 4.68                | 0                 | 1.000                          |
| GFP dsRNA                                                                                              | 18.6            | 18.68 | 18.88 | 13.61          | 13.75 | 13.69 | 4.99        | 4.93  | 5.19 | 5.04                | 0.36              | 0.781                          |
| v-ATPaseA dsRNA                                                                                        | 18.98           | 19.52 | 19.53 | 13.7           | 13.88 | 13.65 | 5.28        | 5.643 | 5.88 | 5.60                | 0.92              | 0.528                          |
| Figure 1: data for BMSB adults injected with in vitro synthesized v-ATPaseA dsRNA from cotton mealybug |                 |       |       |                |       |       |             |       |      |                     |                   |                                |
|                                                                                                        | v-ATPase raw Ct |       |       | 60S RP raw Ct  |       |       | $\Delta$ Ct |       |      | $\Delta$ Ct average | $\Delta\Delta$ Ct | $2^{-(\Delta\Delta\text{Ct})}$ |
| treatment                                                                                              | bio1            | bio2  | bio3  | bio1           | bio2  | bio3  | bio1        | bio2  | bio3 |                     |                   |                                |
| H2O                                                                                                    | 17.14           | 17.16 | 17.01 | 16.41          | 15.56 | 15.78 | 0.73        | 1.6   | 1.23 | 1.19                | 0                 | 1.000                          |
| GFP dsRNA                                                                                              | 17.49           | 17.14 | 17.36 | 16.57          | 16.07 | 16.48 | 0.92        | 1.07  | 0.88 | 0.96                | -0.23             | 1.173                          |
| v-ATPaseA dsRNA                                                                                        | 17.54           | 17.47 | 17.66 | 15.8           | 15.6  | 15.49 | 1.74        | 1.87  | 2.17 | 1.93                | 0.74              | 0.599                          |
| Figure 1: data for MMB injected with in vitro synthesized v-ATPaseA dsRNA from cotton mealybug         |                 |       |       |                |       |       |             |       |      |                     |                   |                                |
|                                                                                                        | v-ATPase raw Ct |       |       | betaTUB raw Ct |       |       | $\Delta$ Ct |       |      | $\Delta$ Ct average | $\Delta\Delta$ Ct | $2^{-(\Delta\Delta\text{Ct})}$ |
| treatment                                                                                              | bio1            | bio2  | bio3  | bio1           | bio2  | bio3  | bio1        | bio2  | bio3 |                     |                   |                                |
| H2O                                                                                                    | 18.43           | 18.76 | 18.9  | 17.4           | 17.56 | 17.72 | 1.03        | 1.2   | 1.18 | 1.14                | 0.00              | 1.000                          |
| GFP dsRNA                                                                                              | 18.59           | 18.2  | 18.37 | 17.56          | 16.72 | 17.1  | 1.03        | 1.48  | 1.27 | 1.26                | 0.12              | 0.918                          |
| v-ATPaseA dsRNA                                                                                        | 19.6            | 19.08 | 19.2  | 16.93          | 17.05 | 17.56 | 2.67        | 2.03  | 1.64 | 2.11                | 0.98              | 0.508                          |

**Supplementary Table S3. Data values for Figure 3B.**

| # of dsRNA molecules    |          |           |           |          |
|-------------------------|----------|-----------|-----------|----------|
| tissue type             | bio1     | bio2      | bio3      | average  |
| tpMicro-tom leaf        | 74225747 | 113643556 | 102254665 | 9.67E+07 |
| tpMicro-tom flower      | 12546809 | 12591925  | 14862062  | 1.33E+07 |
| tpMicro-tom green fruit | 14847245 | 14055934  | 5418000   | 1.14E+07 |
| tpMicro-tom red fruit   | 2353042  | 3818954   | 253       | 2.06E+06 |
| tpMicro-tom root        | 776463   | 667973    | 414457    | 6.20E+05 |

**Supplementary Table S4. Data values for Figure 4A.**

| Figure 4A: data for MMB adults fed with WT Micro-tom or tpMicro-tom plants       |                 |       |       |                |       |       |             |      |      |                     |                   |                                |
|----------------------------------------------------------------------------------|-----------------|-------|-------|----------------|-------|-------|-------------|------|------|---------------------|-------------------|--------------------------------|
|                                                                                  | v-ATPase raw Ct |       |       | betaTUB raw Ct |       |       | $\Delta$ Ct |      |      | $\Delta$ Ct average | $\Delta\Delta$ Ct | $2^{-(\Delta\Delta\text{Ct})}$ |
| treatment                                                                        | bio1            | bio2  | bio3  | bio1           | bio2  | bio3  | bio1        | bio2 | bio3 |                     |                   |                                |
| WT Micro-tom                                                                     | 20.79           | 20.47 | 20.51 | 18.93          | 18.71 | 18.82 | 1.86        | 1.76 | 1.69 | 1.77                | 0                 | 1.000                          |
| tpMicro-tom                                                                      | 21.92           | 21.59 | 21.17 | 20.53          | 19.93 | 19.75 | 1.39        | 1.66 | 1.42 | 1.49                | -0.28             | 1.214                          |
| Figure 4A: data for BMSB adults fed with WT Micro-tom or tpMicro-tom plants      |                 |       |       |                |       |       |             |      |      |                     |                   |                                |
|                                                                                  | v-ATPase raw Ct |       |       | 60S RP raw Ct  |       |       | $\Delta$ Ct |      |      | $\Delta$ Ct average | $\Delta\Delta$ Ct | $2^{-(\Delta\Delta\text{Ct})}$ |
| treatment                                                                        | bio1            | bio2  | bio3  | bio1           | bio2  | bio3  | bio1        | bio2 | bio3 |                     |                   |                                |
| WT Micro-tom                                                                     | 17.1            | 16.69 | 16.86 | 15.55          | 14.76 | 15.17 | 1.55        | 1.93 | 1.69 | 1.72                | 0                 | 1.000                          |
| tpMicro-tom                                                                      | 17.45           | 16.95 | 17.33 | 15.34          | 15.16 | 15.15 | 2.11        | 1.79 | 2.18 | 2.03                | 0.303333          | 0.810                          |
| Figure 4A: data for BMSB 2nd instars fed with WT Micro-tom or tpMicro-tom plants |                 |       |       |                |       |       |             |      |      |                     |                   |                                |
|                                                                                  | v-ATPase raw Ct |       |       | 60S RP raw Ct  |       |       | $\Delta$ Ct |      |      | $\Delta$ Ct average | $\Delta\Delta$ Ct | $2^{-(\Delta\Delta\text{Ct})}$ |
| treatment                                                                        | bio1            | bio2  | bio3  | bio1           | bio2  | bio3  | bio1        | bio2 | bio3 |                     |                   |                                |
| WT Micro-tom                                                                     | 17.32           | 18.26 | 18.25 | 15.92          | 17.13 | 16.65 | 1.4         | 1.13 | 1.6  | 1.38                | 0.00              | 1.000                          |
| tpMicro-tom                                                                      | 18.53           | 19.18 | 18.97 | 16.58          | 17.52 | 16.85 | 1.95        | 1.66 | 2.12 | 1.91                | 0.53              | 0.691                          |
| Figure 4A: data for CPB fed with WT Micro-tom or tpMicro-tom plants              |                 |       |       |                |       |       |             |      |      |                     |                   |                                |
|                                                                                  | v-ATPase raw Ct |       |       | L8e raw Ct     |       |       | $\Delta$ Ct |      |      | $\Delta$ Ct average | $\Delta\Delta$ Ct | $2^{-(\Delta\Delta\text{Ct})}$ |
| treatment                                                                        | bio1            | bio2  | bio3  | bio1           | bio2  | bio3  | bio1        | bio2 | bio3 |                     |                   |                                |
| WT Micro-tom                                                                     | 16.96           | 17.04 | 16.96 | 13.24          | 13.24 | 13.17 | 3.72        | 3.8  | 3.79 | 3.77                | 0.00              | 1.000                          |
| tpMicro-tom                                                                      | 17.98           | 18.08 | 18.28 | 12.63          | 12.73 | 12.81 | 5.35        | 5.35 | 5.47 | 5.39                | 1.62              | 0.325                          |
